# Supplementary material
Source: publisher site journal article supplement (https://static.cambridge.org/content/id/urn:cambridge.org:id:article:S1935789321001129/resource/name/S1935789321001129supp001.docx)
Supplement: Supplementary file 1 [file S1935789321001129supp001.docx]

| **Supplemental Table 1. Pregnancy and delivery.** | | | |
| --- | --- | --- | --- |
| Women (aged 15-49) who had a delivery in past year | **East Mosul (%)** | **West Mosul (%)** | **All Mosul (%)** |
| Live birth not reported | 472 (91.5) | 370 (92.0) | 842 (91.7) |
| Live birth reported | 44 (8.5) | 32 (8.0) | 76 (8.3) |
| Mean number ANC visits* | 3.94 | 2.31 | 3.16 |
| ***Site of the delivery*** | | | |
| Clinic/Hospital | 43 (97.7) | 31 (96.9) | 74 (97.4) |
| Elsewhere | 1 (2.2) | 1 (3.1) | 2 (2.6) |
| Delivered by doctor | 41 (93.2) | 31 (96.9) | 72 (94.7) |
| ***Complications*** | | | |
| Antepartum hemorrhage | - | - | - |
| Postpartum hemorrhage | 1 (2.3) | 1 (2.9) | 2 (2.6) |
| Sepsis | 1 (2.3) | 1 (2.9) | 2 (2.6) |
| Eclampsia | - | - | - |
| Obstructed labor | - | 2 (5.7) | 2 (2.6) |
| Abortion | 2 (4.7) | - | 2 (2.6) |
| Hypertension | 1 (2.3) | 3 (8.6) | 4 (5.1) |
| Anemia | - | - | - |
| Death | - | - | - |
| None | 38 (88.4) | 28 (80.0) | 66 (84.6) |
| ***Current status of the child*** | | | |
| Alive and healthy | 40 | 33 | 73 |
| Alive but ill | - | 1 | 1 |
| Died at first month | 1 | - | 1 |
| Died within first year | - | 1 | 1 |
| *20 (21%) of women reported no ANC visit | | | |
